# Supplementary material for: Chemical characterization of organosulfates in secondary organic aerosolderived from the photooxidation of alkanes
Source: Copernicus journal article supplement (doi:10.5194/acp-16-11001-2016), 2016-09-06
Supplement: Supplementary file 1 [file acp-16-11001-2016-supplement.pdf]

Supplement of Atmos. Chem. Phys., 16, 11001–11018, 2016  
<http://www.atmos-chem-phys.net/16/11001/2016/>  
doi:10.5194/acp-16-11001-2016-supplement  
© Author(s) 2016. CC Attribution 3.0 License.

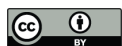

Atmospheric  
Chemistry  
and Physics  
Open Access  
EGU

*Supplement of*

## **Chemical characterization of organosulfates in secondary organic aerosol derived from the photooxidation of alkanes**

**Matthieu Riva et al.**

*Correspondence to:* J. D. Surratt ([surratt@unc.edu](mailto:surratt@unc.edu))

The copyright of individual parts of the supplement might differ from the CC-BY 3.0 licence.

**Table S1.** Proposed structures, retention times, formulas and accurate masses of organosulfates (OSs) identified in dodecane, decalin and cyclodecane SOA.

| [M - H] <sup>-</sup> ion ( <i>m/z</i> ) | VOC         | Retention time (min) | Measured mass | Error (ppm) | Q-TOFMS suggested formula                                     | DBE | Proposed structure                                                                   |
|-----------------------------------------|-------------|----------------------|---------------|-------------|---------------------------------------------------------------|-----|--------------------------------------------------------------------------------------|
| 195                                     | Decalin     | 7.93                 | 195.0697      | 3.03        | C <sub>7</sub> H <sub>15</sub> O <sub>4</sub> S <sup>-</sup>  | 0   | Not Identified                                                                       |
| 209                                     | Dodecane    | 6.75                 | 209.0472      | 5.62        | C <sub>7</sub> H <sub>13</sub> O <sub>5</sub> S <sup>-</sup>  | 1   | Not Identified                                                                       |
| 237                                     | Dodecane    | 9.12                 | 237.0786      | 4.67        | C <sub>9</sub> H <sub>17</sub> O <sub>5</sub> S <sup>-</sup>  | 1   | Not Identified                                                                       |
| 249                                     | Cyclodecane | 8.51                 | 249.0807      | 2.84        | C <sub>10</sub> H <sub>17</sub> O <sub>5</sub> S <sup>-</sup> | 2   | 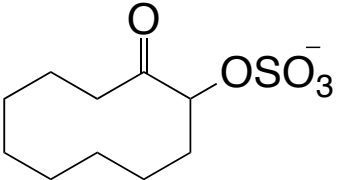  |
|                                         |             | 9.31                 | 249.0797      | 1.5         |                                                               |     |                                                                                      |
| 251                                     | Cyclodecane | 8.51                 | 251.0950      | 1.28        | C <sub>10</sub> H <sub>19</sub> O <sub>5</sub> S <sup>-</sup> | 1   |  |
|                                         |             | 9.31                 | 251.0953      | 0.10        |                                                               |     |                                                                                      |
| 255                                     | Dodecane    | 8.87                 | 255.0914      | 4.56        | C <sub>9</sub> H <sub>19</sub> O <sub>6</sub> S <sup>-</sup>  | 1   | Not Identified                                                                       |

|     |             |      |          |      |                      |   |                                                                                       |
|-----|-------------|------|----------|------|----------------------|---|---------------------------------------------------------------------------------------|
| 265 | Cyclodecane | 6.40 | 265.0747 | 1.41 | $C_{10}H_{17}O_6S^-$ | 2 | 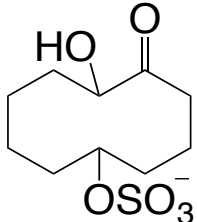   |
| 265 | Decalin     | 4.40 | 265.0749 | 1.18 | $C_{10}H_{17}O_6S^-$ | 2 |    |
|     |             | 5.80 | 265.0757 | 4.19 |                      |   |                                                                                       |
|     |             | 6.75 | 265.0742 | 1.45 |                      |   |                                                                                       |
|     |             | 8.10 | 265.0754 | 3.06 |                      |   |                                                                                       |
| 267 | Decalin     | 6.38 | 267.0553 | 0.02 | $C_9H_{15}O_7S^-$    | 2 |    |
|     |             | 7.20 | 267.0550 | 2.55 |                      |   |                                                                                       |
| 267 | Cyclodecane | 8.98 | 267.0914 | 2.16 | $C_{10}H_{19}O_6S^-$ | 1 |   |
|     |             | 9.61 | 267.0903 | 1.70 |                      |   |                                                                                       |
| 269 | Decalin     | 8.04 | 269.0696 | 0.73 | $C_9H_{17}O_7S^-$    | 1 |  |
| 279 | Cyclodecane | 5.77 | 279.0554 | 2.05 | $C_{10}H_{15}O_7S^-$ | 3 | Not Identified                                                                        |
|     |             | 6.76 | 279.0551 | 5.40 |                      |   |                                                                                       |

|     |             |       |          |      |                      |   |                                                                                       |
|-----|-------------|-------|----------|------|----------------------|---|---------------------------------------------------------------------------------------|
| 279 | Dodecane    | 11.73 | 279.1256 | 3.66 | $C_{12}H_{23}O_5S^-$ | 1 | 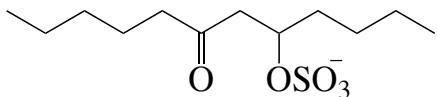   |
|     |             | 12.04 | 279.1254 | 4.37 |                      |   |                                                                                       |
|     |             | 12.44 | 279.1265 | 0.43 |                      |   |                                                                                       |
| 281 | Cyclodecane | 6.98  | 281.0698 | 0.64 | $C_{10}H_{17}O_7S^-$ | 2 |    |
|     |             | 7.27  | 281.0705 | 2.00 |                      |   |                                                                                       |
|     |             | 8.01  | 281.0702 | 1.20 |                      |   |                                                                                       |
| 285 | Decalin     | 6.22  | 285.0651 | 0.95 | $C_9H_{17}O_8S^-$    | 1 |    |
|     |             | 6.51  | 285.0648 | 0.58 |                      |   |                                                                                       |
|     |             | 7.10  | 295.0505 | 4.44 |                      |   |                                                                                       |
| 295 | Decalin     | 6.84  | 295.0495 | 1.19 | $C_{10}H_{15}O_8S^-$ | 3 |  |
|     |             | 7.10  | 295.0505 | 4.44 |                      |   |                                                                                       |
|     |             | 7.62  | 295.0506 | 5.16 |                      |   |                                                                                       |

|     |          |      |          |      |                       |   |                                                                                      |
|-----|----------|------|----------|------|-----------------------|---|--------------------------------------------------------------------------------------|
| 297 | Decalin  | 6.84 | 297.0657 | 4.31 | $C_{10}H_{17}O_8S^-$  | 2 | 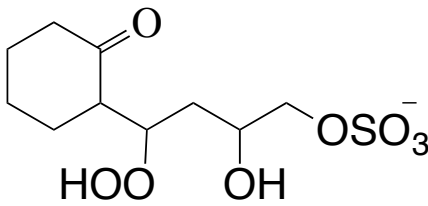  |
|     |          | 7.62 | 297.0645 | 0.27 |                       |   |                                                                                      |
|     |          | 8.30 | 297.0652 | 2.63 |                       |   |                                                                                      |
| 299 | Decalin  | 7.65 | 299.0805 | 2.05 | $C_{10}H_{19}O_8S^-$  | 1 | Not Identified                                                                       |
|     |          | 7.88 | 299.0801 | 1.26 |                       |   |                                                                                      |
| 307 | Dodecane | 7.93 | 307.0833 | 4.49 | $C_{12}H_{19}O_7S^-$  | 3 | Not Identified                                                                       |
| 311 | Decalin  | 6.57 | 311.0444 | 0.23 | $C_{10}H_{15}O_9S^-$  | 3 |   |
|     |          | 7.00 | 311.0450 | 1.98 |                       |   |                                                                                      |
| 326 | Decalin  | 7.26 | 326.0551 | 1.59 | $C_{10}H_{16}NO_9S^-$ | 3 |  |
|     |          | 8.14 | 326.0550 | 1.28 |                       |   |                                                                                      |
|     |          | 9.38 | 326.0554 | 2.51 |                       |   |                                                                                      |
|     |          | 9.95 | 326.0557 | 3.43 |                       |   |                                                                                      |

**Table S2.** Concentrations ( $\text{ng m}^{-3}$ ) of OSs quantified (using methanol) in dodecane chamber experiments in presence of ammonium sulfate aerosol. Ratios of OS quantified using acetonitrile/toluene (ACN-Tol) divided by OS quantified using methanol as solvent mixture are also reported.

| $[\text{M} - \text{H}]^-$                                                     | No-Ac<br>Dry | Ac-Dry | No-Ac<br>Wet | Ac-Wet | Ac-Wet | Ac-Dry | ACN-<br>Tol/Methanol |
|-------------------------------------------------------------------------------|--------------|--------|--------------|--------|--------|--------|----------------------|
| $\text{C}_7\text{H}_{13}\text{O}_5\text{S}^-$<br>(209.0472) <sup>a,b</sup>    | 0.58         | 0.57   | 0.93         | 0.92   | 0.75   | 0.78   | $0.99 \pm 0.11$      |
| $\text{C}_9\text{H}_{17}\text{O}_5\text{S}^-$<br>(237.0786) <sup>a,b</sup>    | 2.87         | 2.80   | 1.97         | 2.48   | 3.16   | 3.54   | $0.82 \pm 0.20$      |
| $\text{C}_9\text{H}_{19}\text{O}_5\text{S}^-$<br>(255.0914) <sup>a,b</sup>    | 2.65         | 3.10   | 3.10         | 3.33   | 3.66   | 4.19   | $0.95 \pm 0.20$      |
| $\text{C}_{12}\text{H}_{23}\text{O}_5\text{S}^-$<br>(279.1254) <sup>c,d</sup> | 1.98         | 7.76   | 1.45         | 2.65   | 1.75   | 8.20   | $1.81 \pm 0.37$      |
| $\text{C}_{12}\text{H}_{19}\text{O}_7\text{S}^-$<br>(307.0040) <sup>a,b</sup> | 0.82         | 1.18   | 0.47         | 0.71   | 1.41   | 1.76   | $1.67 \pm 0.43$      |
| Sum                                                                           | 8.92         | 15.41  | 7.92         | 10.11  | 10.74  | 18.45  | $1.28 \pm 0.12$      |

<sup>a</sup> Quantified using 3-pinanol-2-hydrogen sulfate ( $\text{C}_9\text{H}_{13}\text{O}_6\text{S}^-$ ) as a surrogate standard, <sup>b</sup> OSs belonging to Group-2, <sup>c</sup> quantified using octyl sulfate as a surrogate standard, <sup>d</sup> OSs belonging to Group-1. Different isomers for one ion have been summed; Ac. and No Ac. correspond to acidified and no-acidified sulfate seed aerosol, respectively.

**Table S3.** Concentrations (ng m<sup>-3</sup>) of OSs quantified (using methanol) in decalin chamber experiments in presence of ammonium sulfate aerosol. Ratios of OS quantified using acetonitrile/toluene (ACN-Tol) divided by OS quantified using methanol as solvent mixture are also reported.

| [M - H] <sup>-</sup>                                                                        | No-Ac<br>Dry | Ac-Dry | No-Ac<br>Wet | Ac-Wet | Ac-Wet | Ac-Dry | ACN-<br>Tol/Methanol |
|---------------------------------------------------------------------------------------------|--------------|--------|--------------|--------|--------|--------|----------------------|
| C <sub>7</sub> H <sub>15</sub> O <sub>4</sub> S <sup>-</sup><br>(195.0697) <sup>a,b</sup>   | 26.9         | 47.4   | 19.6         | 29.7   | 33.1   | 33.0   | 0.84 ± 0.23          |
| C <sub>10</sub> H <sub>17</sub> O <sub>6</sub> S <sup>-</sup><br>(265.0749) <sup>a,c</sup>  | 12.1         | 54.3   | 23.2         | 49.7   | 25.5   | 37.8   | 1.66 ± 0.45          |
| C <sub>9</sub> H <sub>15</sub> O <sub>7</sub> S <sup>-</sup><br>(267.0553) <sup>a,c</sup>   | 17.3         | 78.6   | 23.1         | 41.3   | 36.1   | 70.5   | 1.81 ± 0.42          |
| C <sub>9</sub> H <sub>17</sub> O <sub>7</sub> S <sup>-</sup><br>(269.0696) <sup>a,b</sup>   | 58.4         | 72.5   | 36.5         | 49.7   | 61.4   | 63.0   | 1.07 ± 0.20          |
| C <sub>10</sub> H <sub>17</sub> O <sub>7</sub> S <sup>-</sup><br>(281.0702) <sup>a,c</sup>  | 16.7         | 61.4   | 21.0         | 43.4   | 22.5   | 48.1   | 2.04 ± 0.26          |
| C <sub>9</sub> H <sub>17</sub> O <sub>8</sub> S <sup>-</sup><br>(285.0651) <sup>a,c</sup>   | 48.4         | 349.6  | 96.1         | 279.1  | 129.4  | 114.5  | 1.88 ± 0.55          |
| C <sub>10</sub> H <sub>15</sub> O <sub>8</sub> S <sup>-</sup><br>(295.0495) <sup>a,c</sup>  | 41.0         | 90.3   | 27.7         | 46.0   | 40.7   | 82.0   | 2.11 ± 0.75          |
| C <sub>10</sub> H <sub>17</sub> O <sub>8</sub> S <sup>-</sup><br>(297.0657) <sup>a,b</sup>  | 16.3         | 51.5   | 20.4         | 37.5   | 19.1   | 28.7   | 2.07 ± 0.38          |
| C <sub>10</sub> H <sub>19</sub> O <sub>8</sub> S <sup>-</sup><br>(299.0805) <sup>a,c</sup>  | 6.7          | 41.7   | 5.1          | 8.8    | 5.2    | 20.3   | 1.72 ± 0.37          |
| C <sub>10</sub> H <sub>15</sub> O <sub>9</sub> S <sup>-</sup><br>(311.0444) <sup>a,c</sup>  | 20.3         | 40.2   | 22.9         | 36.3   | 17.5   | 40.7   | 2.13 ± 0.26          |
| C <sub>10</sub> H <sub>16</sub> NO <sub>9</sub> S <sup>-</sup><br>(326.0551) <sup>a,c</sup> | 7.9          | 54.0   | 38.8         | 104.4  | 27.1   | 71.6   | 3.03 ± 0.62          |
| Sum                                                                                         | 272.0        | 941.9  | 334.4        | 726.0  | 417.7  | 610.1  | 1.78 ± 0.16          |

<sup>a</sup> Quantified using 3-pinanol-2-hydrogen sulfate (C<sub>9</sub>H<sub>13</sub>O<sub>6</sub>S<sup>-</sup>) as a surrogate standard, <sup>b</sup> OSs belonging to Group-2, <sup>c</sup> OSs belonging to Group-1. Different isomers for one ion have been summed; Ac. and No Ac. correspond to acidified and no-acidified sulfate seed aerosol, respectively.

**Table S4.** Concentrations ( $\text{ng m}^{-3}$ ) of OSs quantified (using methanol) in cyclodecane chamber experiments in presence of ammonium sulfate aerosol. Ratios of OS quantified using acetonitrile/toluene (ACN-Tol) divided by OS quantified using methanol as solvent mixture are also reported.

| $[\text{M} - \text{H}]^-$                                                     | No-Ac<br>Dry | Ac-Dry | No-Ac<br>Wet | Ac-Wet      | Ac-Wet      | Ac-Dry | ACN-<br>Tol/Methanol |
|-------------------------------------------------------------------------------|--------------|--------|--------------|-------------|-------------|--------|----------------------|
| $\text{C}_{10}\text{H}_{17}\text{O}_5\text{S}^-$<br>(249.0807) <sup>a,b</sup> | 2.5          | 48.1   | 3.9          | 4.6         | 3.2         | 26.5   | $2.30 \pm 0.33$      |
| $\text{C}_{10}\text{H}_{19}\text{O}_5\text{S}^-$<br>(251.0950) <sup>a,b</sup> | 3.2          | 39.2   | 3.8          | 4.6         | 4.1         | 24.4   | $1.92 \pm 0.10$      |
| $\text{C}_{10}\text{H}_{17}\text{O}_6\text{S}^-$<br>(265.0747) <sup>a,b</sup> | 10.4         | 40.8   | 7.4          | 9.4         | 5.5         | 44.0   | $1.52 \pm 0.30$      |
| $\text{C}_{10}\text{H}_{19}\text{O}_6\text{S}^-$<br>(267.0914) <sup>a,b</sup> | 4.6          | 39.4   | 5.0          | 5.7         | 9.4         | 22.9   | $1.36 \pm 0.10$      |
| $\text{C}_{10}\text{H}_{15}\text{O}_7\text{S}^-$<br>(279.0554) <sup>a</sup>   | <i>N.d.</i>  | 6.4    | <i>N.d.</i>  | <i>N.d.</i> | <i>N.d.</i> | 2.5    |                      |
| $\text{C}_{10}\text{H}_{17}\text{O}_7\text{S}^-$<br>(281.0698) <sup>a,b</sup> | 5.8          | 28.3   | 3.9          | 4.4         | 4.5         | 19.3   | $1.64 \pm 0.28$      |
| Sum                                                                           | 26.5         | 202.3  | 23.9         | 28.8        | 26.7        | 139.6  | $1.74 \pm 0.15$      |

<sup>a</sup> Quantified using 3-pinanol-2-hydrogen sulfate ( $\text{C}_9\text{H}_{13}\text{O}_6\text{S}^-$ ) as a surrogate standard, <sup>b</sup> OSs belonging to Group-1. Different isomers for one ion have been summed; *N.d.*: not detected; Ac. and No Ac. correspond to acidified and no-acidified sulfate seed aerosol, respectively.



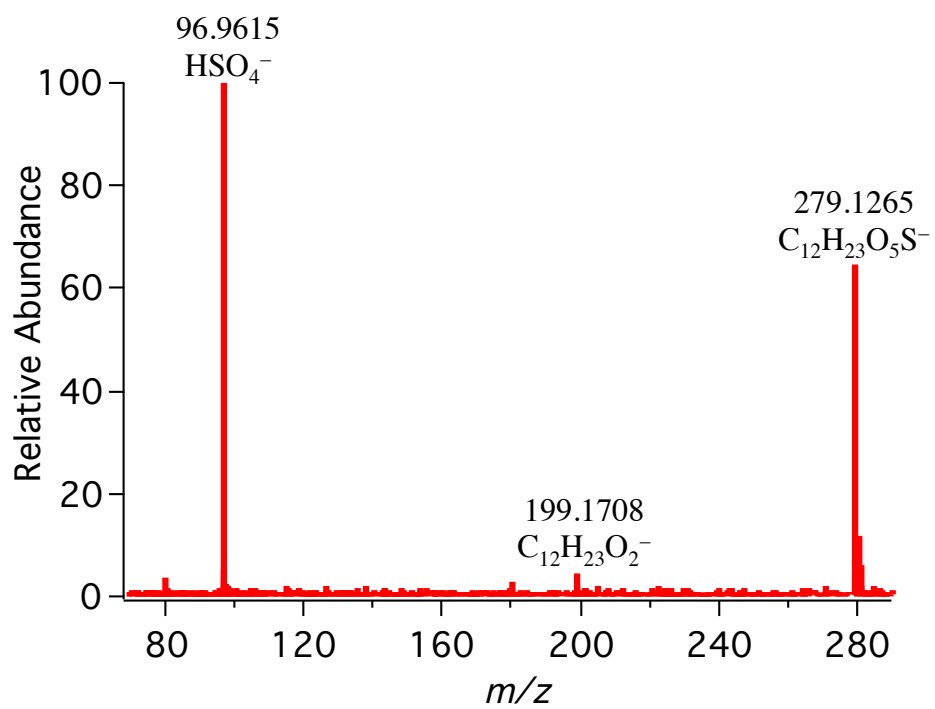

**Figure S1.** MS<sup>2</sup> spectrum obtained for dodecane-derived OS-279 (*m/z*, 279.1274). Fragmentation scheme is proposed in Figure 1.

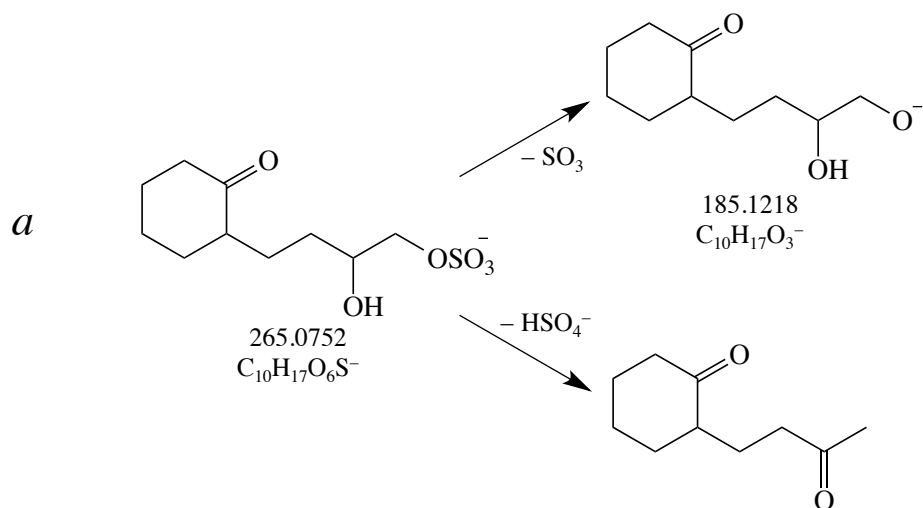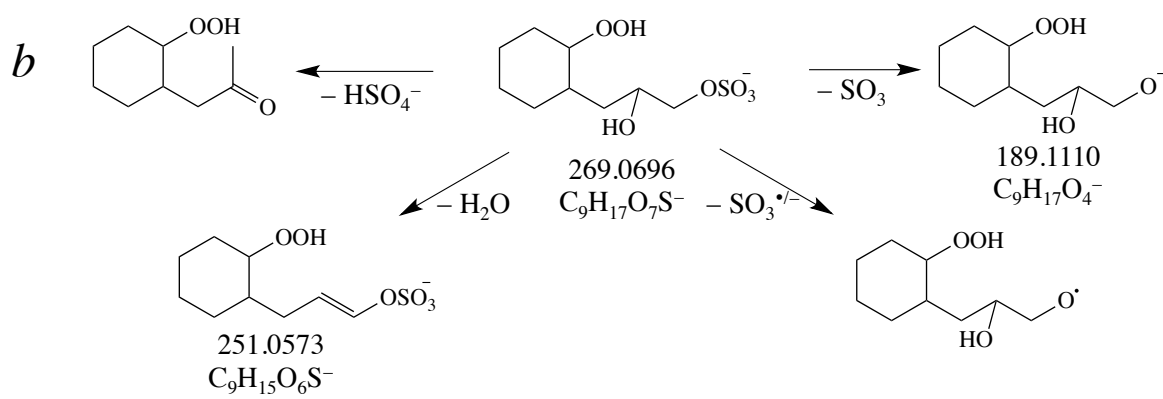

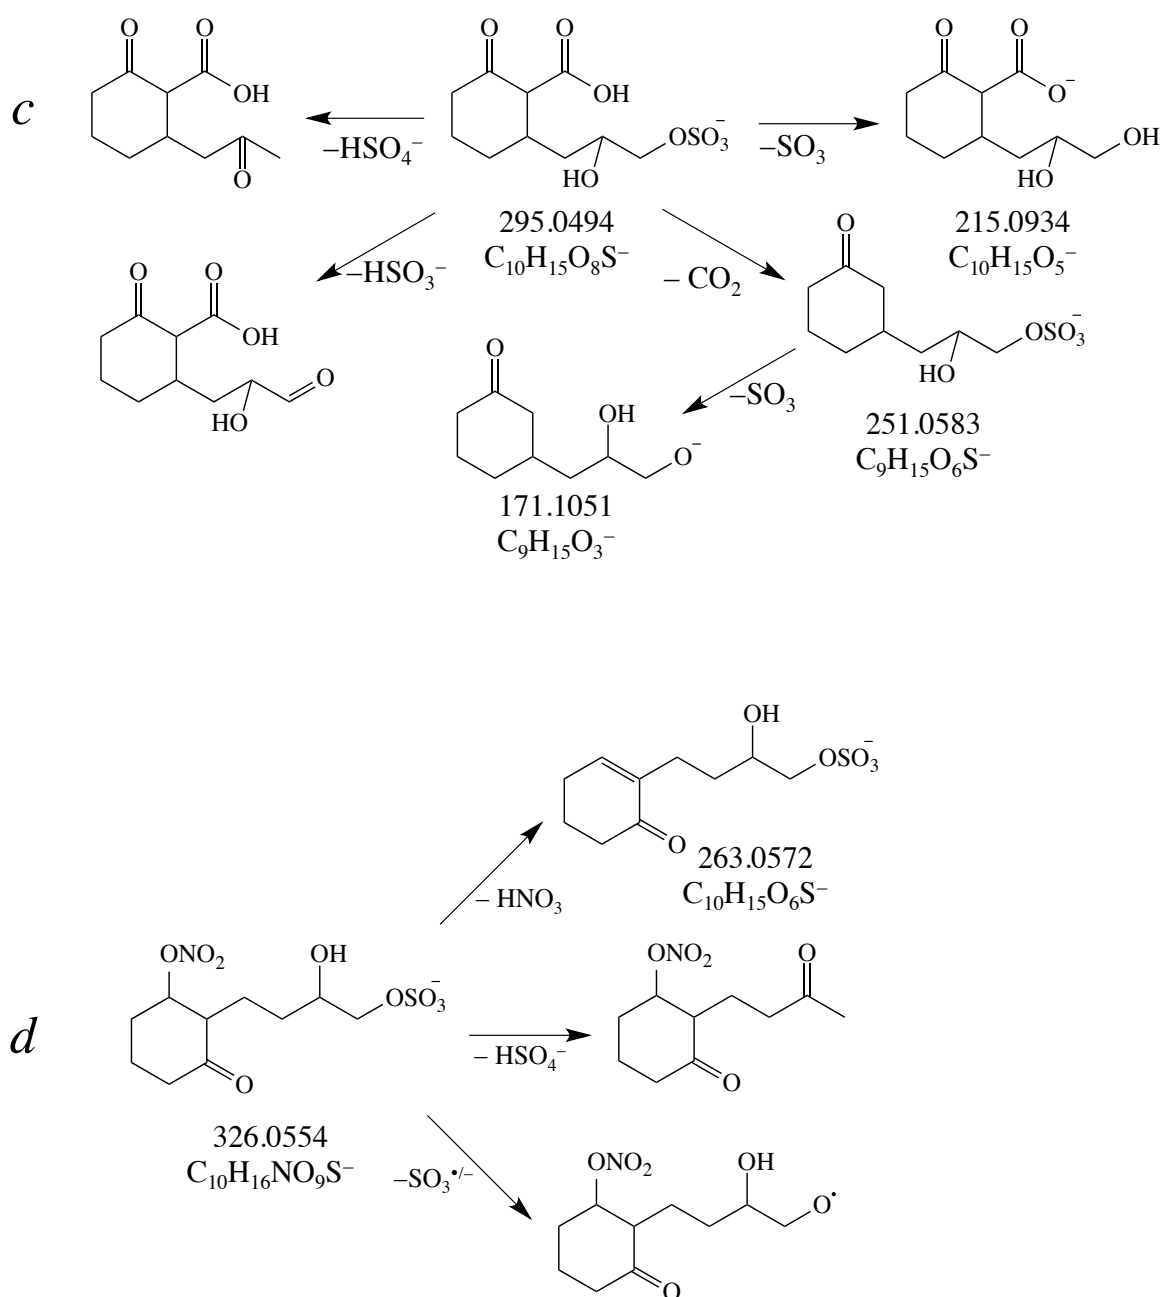

**Figure S2.** Fragmentation schemes for selected decalin-derived OSs: *a*)  $m/z$  265.0752 (C<sub>10</sub>H<sub>17</sub>O<sub>6</sub>S<sup>-</sup>), *b*)  $m/z$  269.0696 (C<sub>9</sub>H<sub>17</sub>O<sub>7</sub>S<sup>-</sup>), *c*)  $m/z$  295.0494 (C<sub>10</sub>H<sub>15</sub>O<sub>8</sub>S<sup>-</sup>) and *d*)  $m/z$  326.0554 (C<sub>10</sub>H<sub>16</sub>NO<sub>9</sub>S<sup>-</sup>). MS<sup>2</sup> spectra are reported in Figure 2.

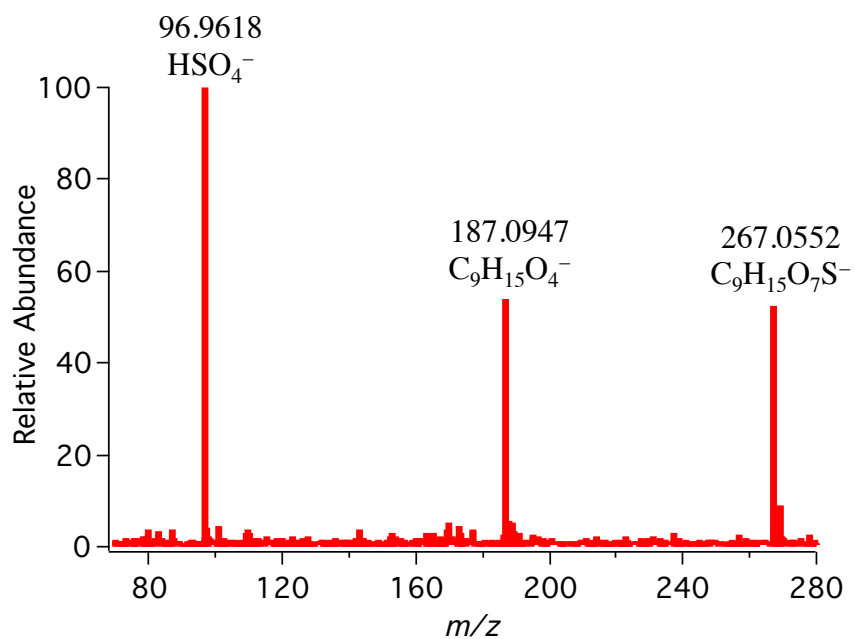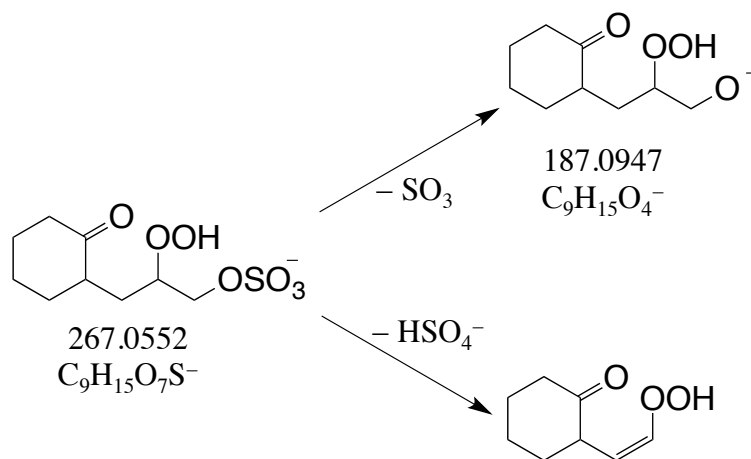

**Figure S3.** MS<sup>2</sup> spectrum and fragmentation scheme of ion at  $m/z$  267.0552 identified in SOA formed from decalin oxidation.

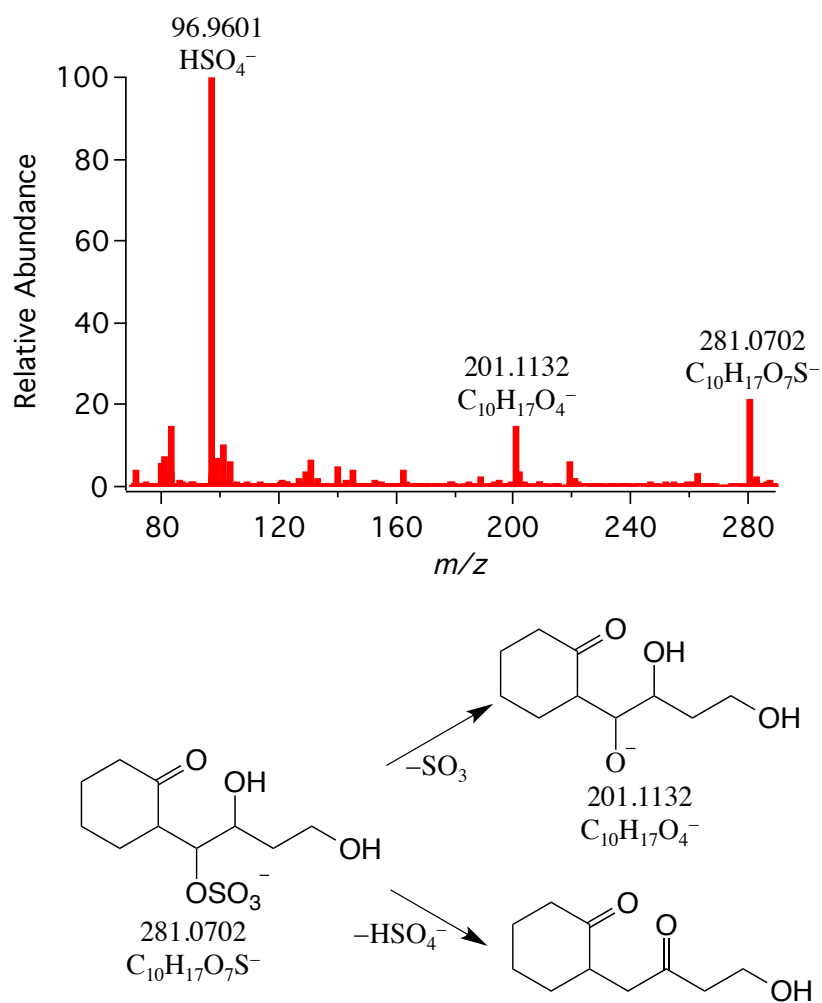

**Figure S4.** MS<sup>2</sup> spectrum and fragmentation scheme of the parent ion at  $m/z$  281.0702 identified in SOA formed from decalin oxidation.

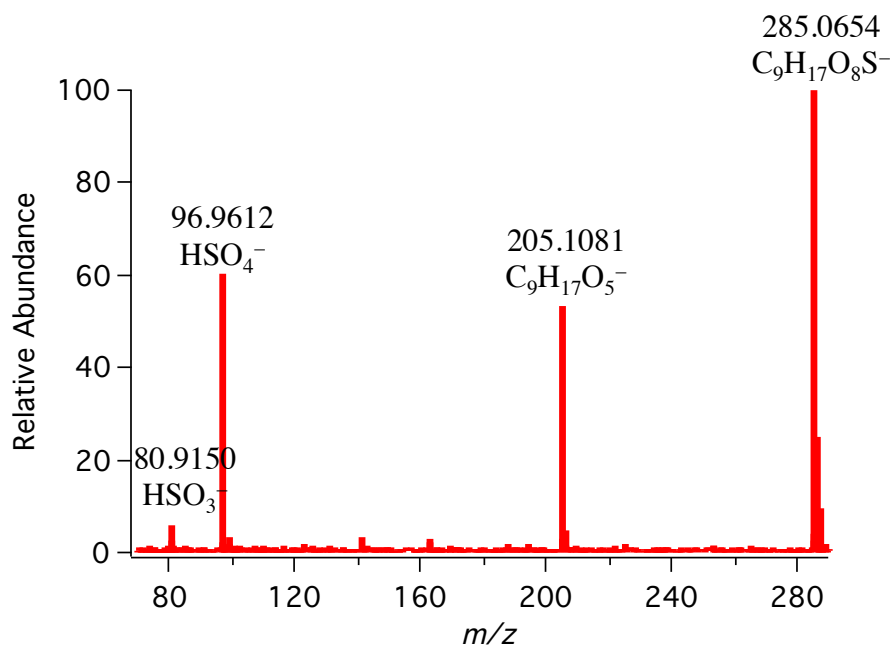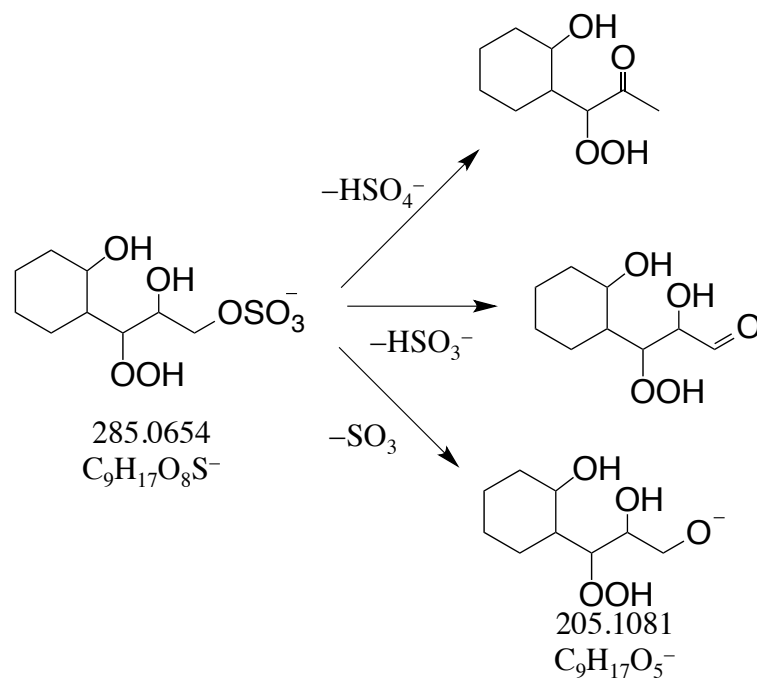

**Figure S5.** MS<sup>2</sup> spectrum and fragmentation scheme of the parent ion at  $m/z$  285.0654 identified in SOA formed from decalin oxidation.

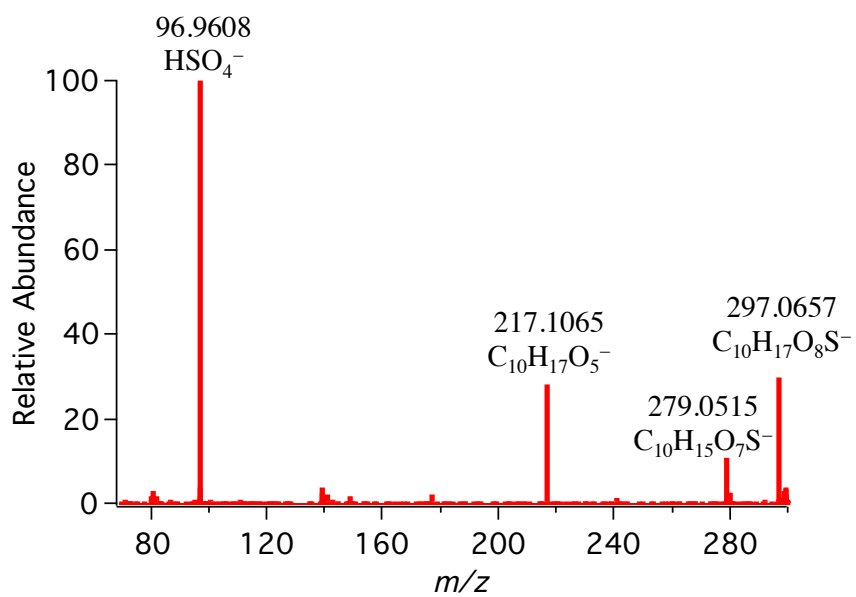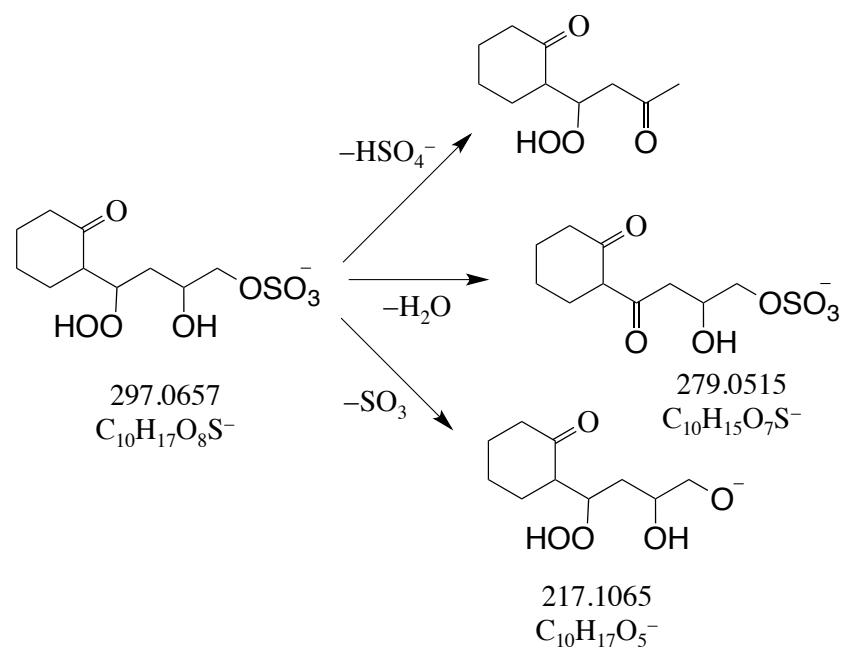

**Figure S6.** MS<sup>2</sup> spectrum and fragmentation scheme of the parent ion at  $m/z$  297.0669 identified in SOA formed from decalin oxidation.

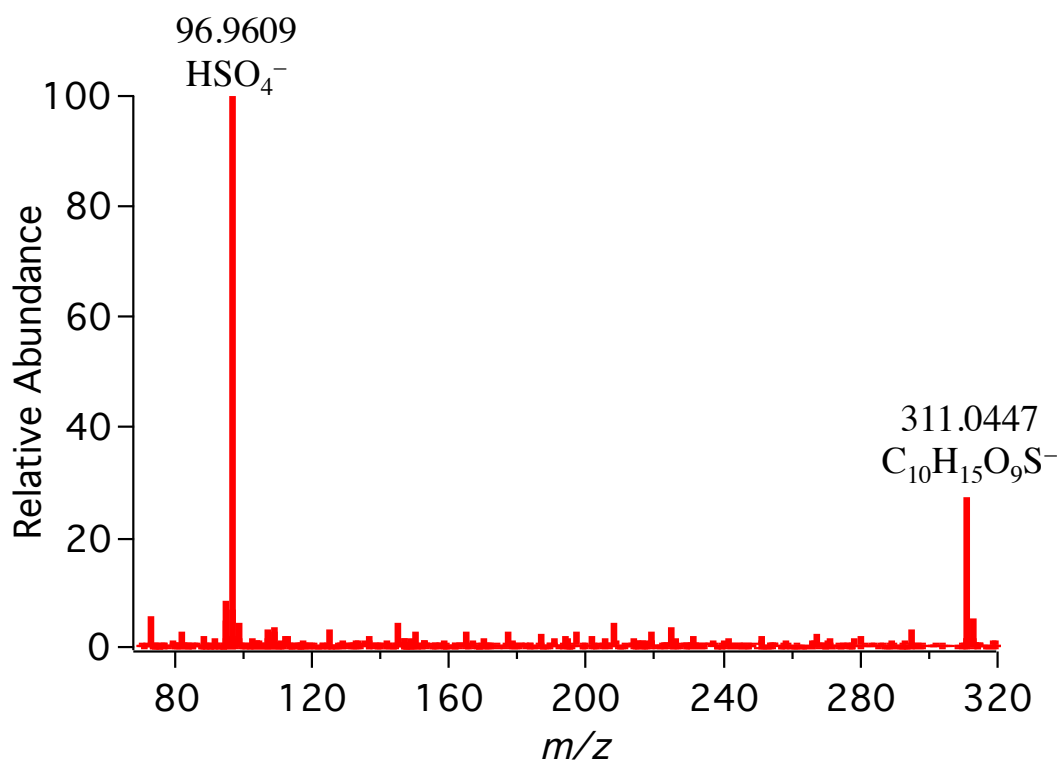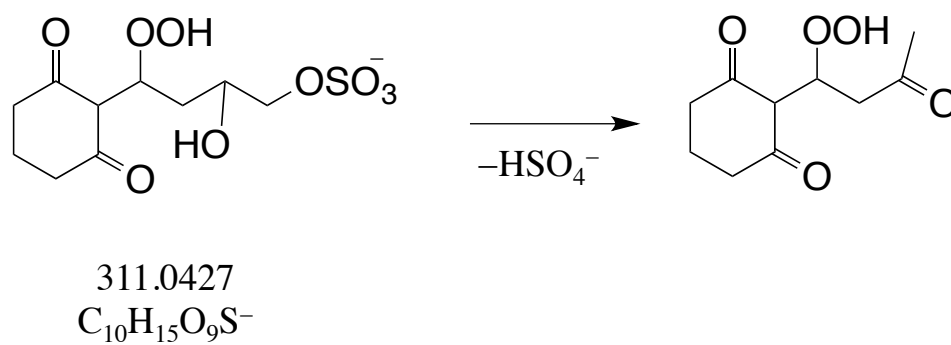

**Figure S7.** MS<sup>2</sup> spectrum and fragmentation scheme of the parent ion at  $m/z$  311.0427 identified in SOA formed from decalin oxidation.



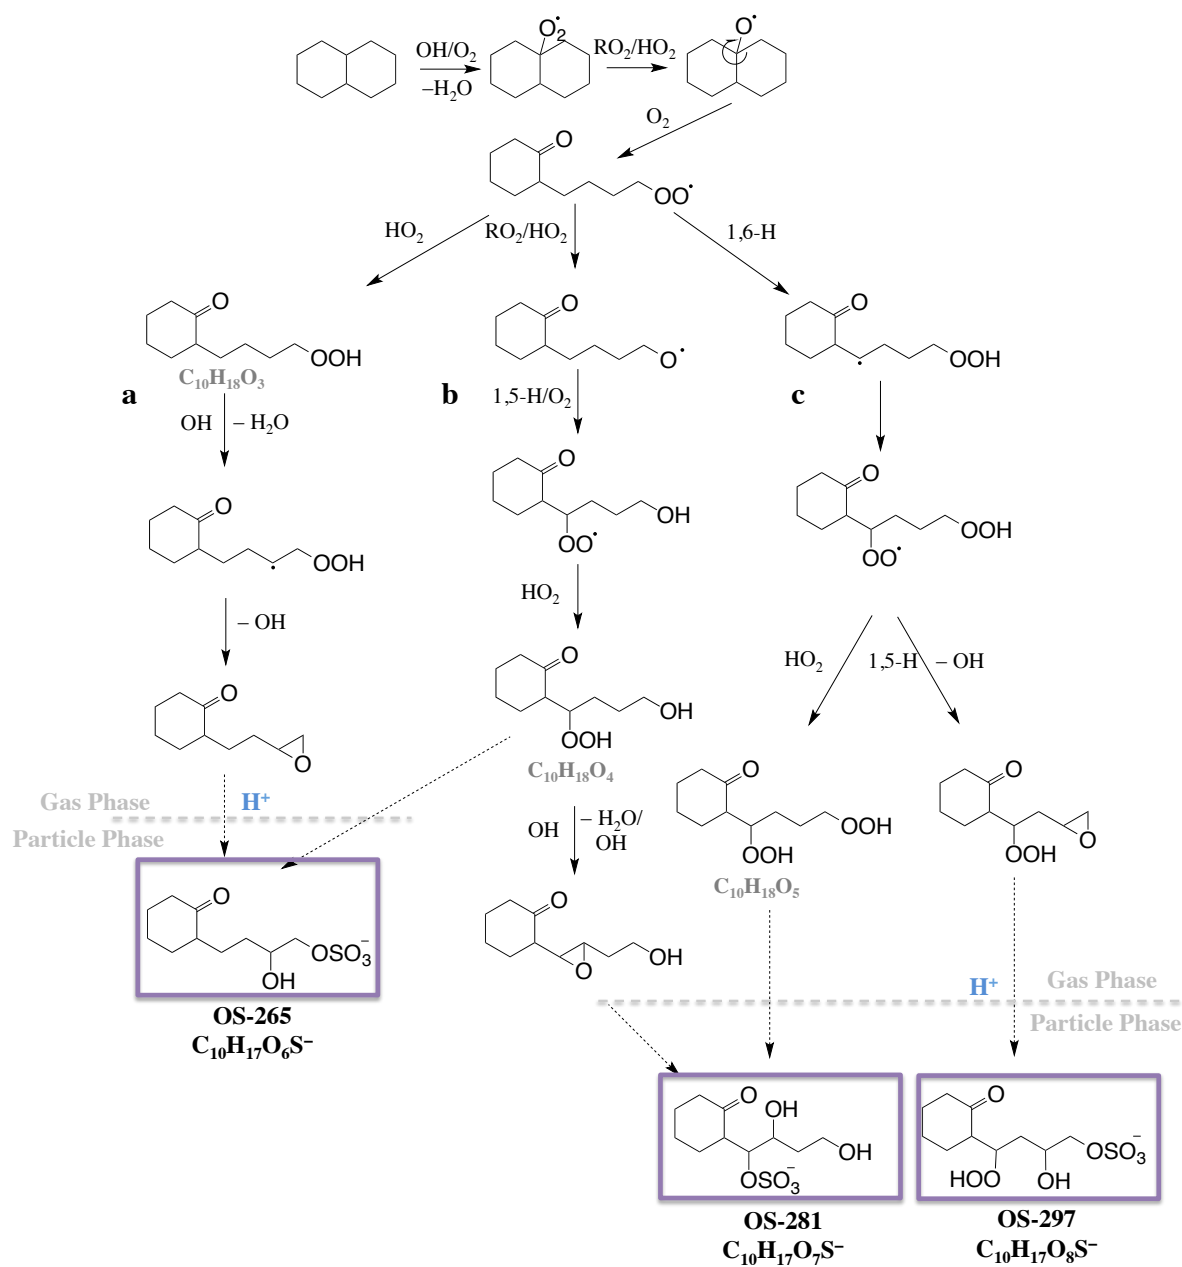

**Figure S8.** Tentatively proposed formation pathways of OS-265 (265.0752), OS-281 (281.0702) and OS-295 (295.0494) from the oxidation of decalin in the presence of ammonium sulfate aerosol.

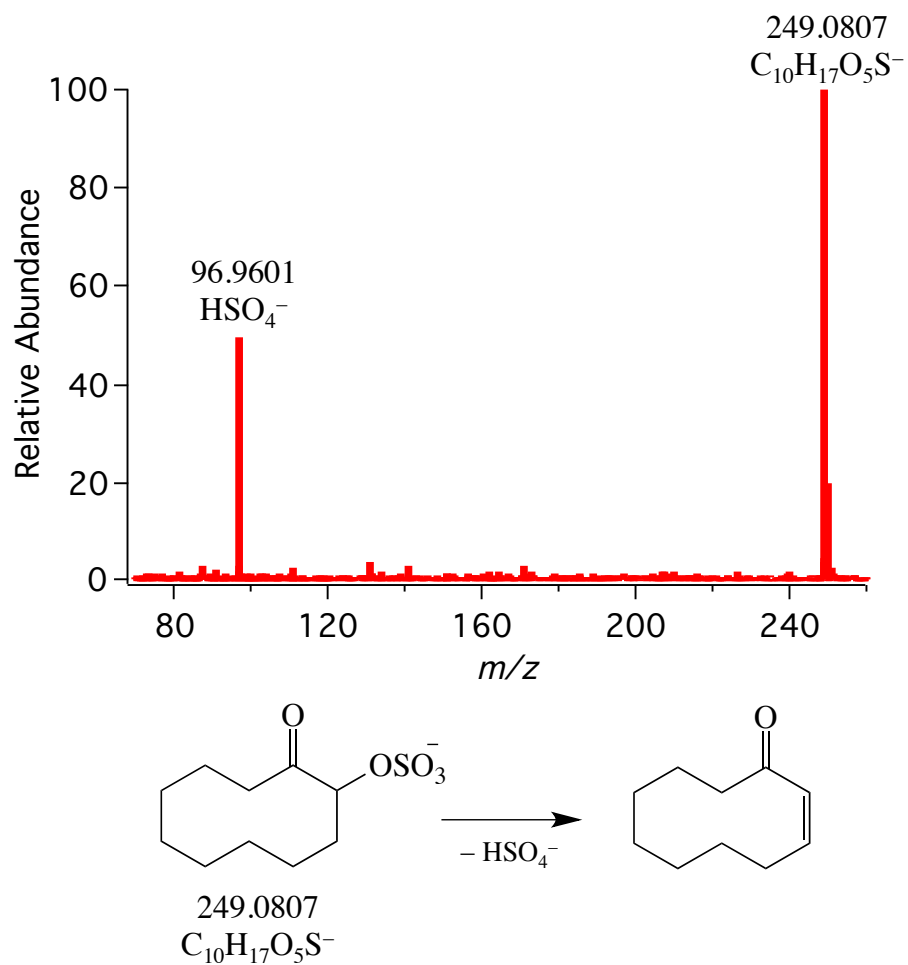

**Figure S9.** MS<sup>2</sup> spectrum and fragmentation scheme of the parent ion at *m/z* 249.0807 identified in SOA formed from cyclodecane oxidation.

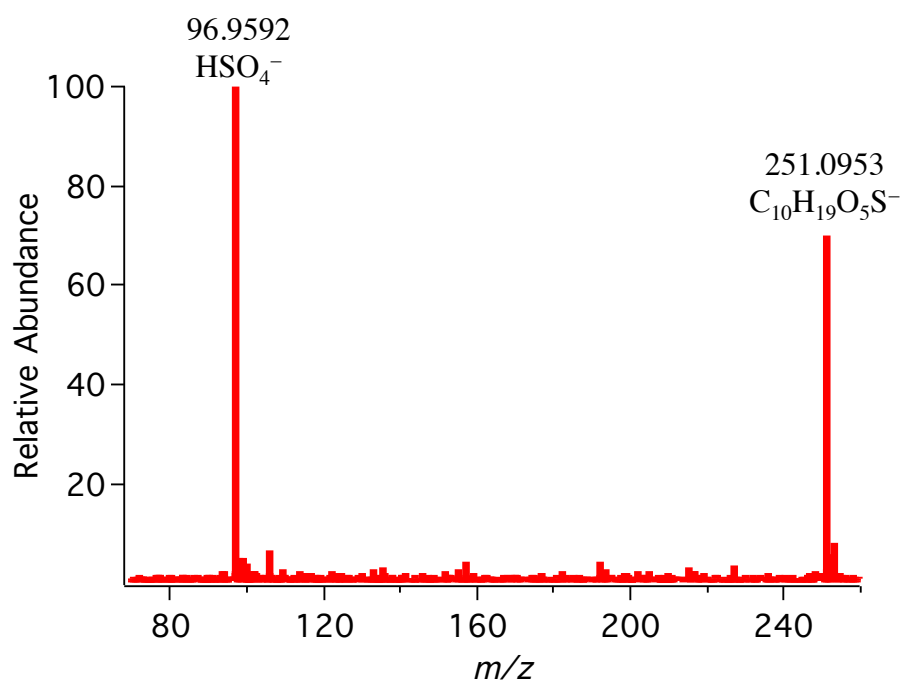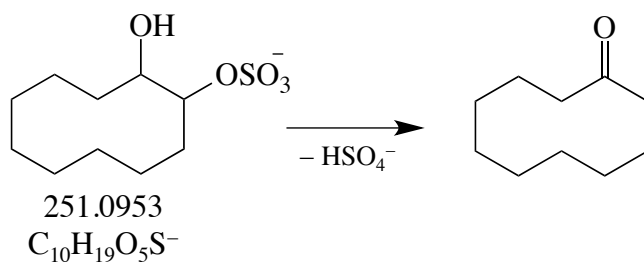

**Figure S10.** MS<sup>2</sup> spectrum and fragmentation scheme of the parent ion at  $m/z$  251.0953 identified in SOA formed from cyclodecane oxidation.

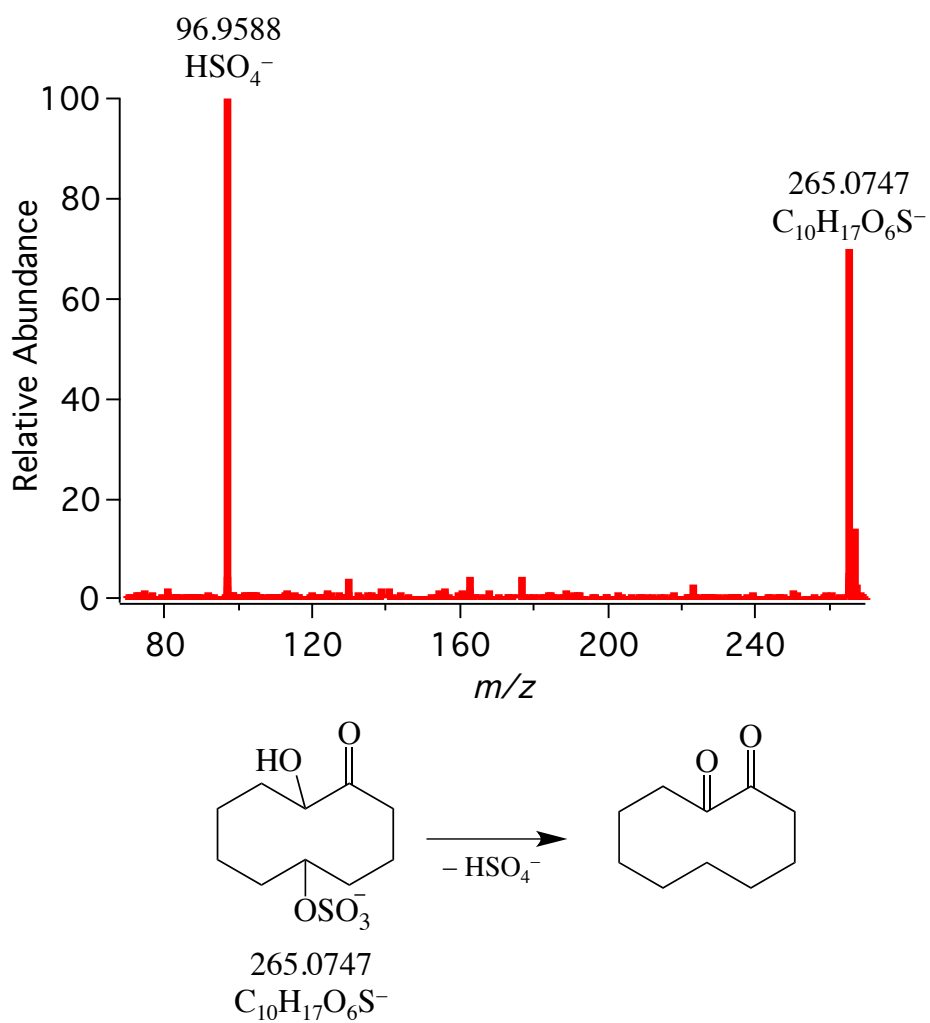

**Figure S11.** MS<sup>2</sup> spectrum and fragmentation scheme of the parent ion at *m/z* 265.0747 identified in SOA formed from cyclodecane oxidation.

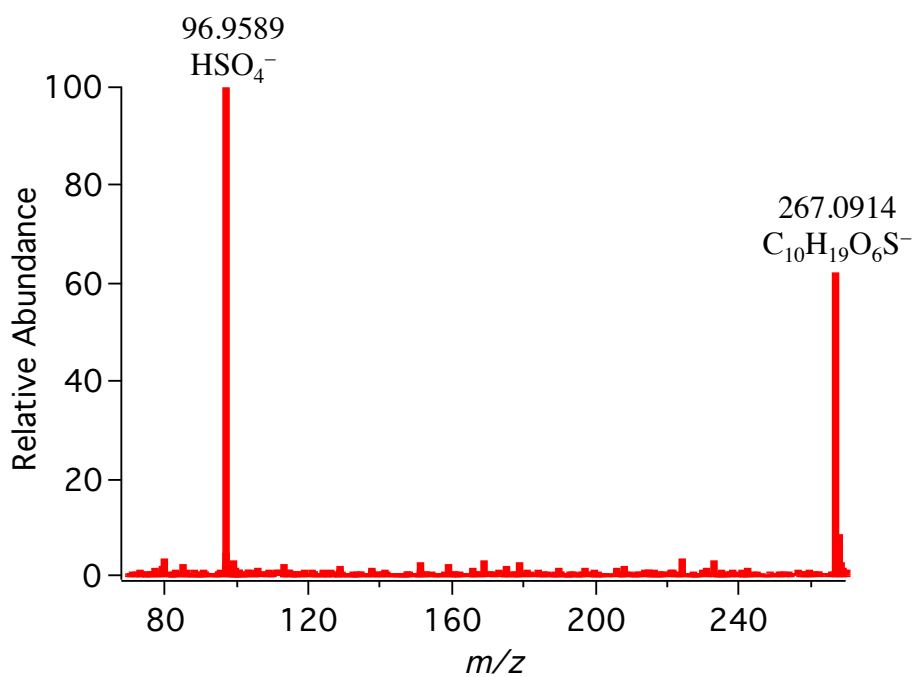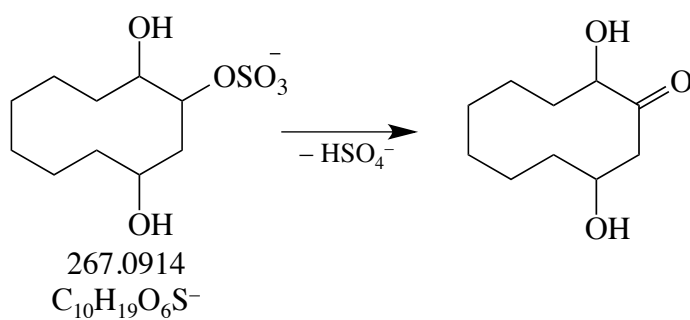

**Figure S12.** MS<sup>2</sup> spectrum and fragmentation scheme of the parent ion at  $m/z$  267.0914 identified in SOA formed from cyclodecane oxidation.

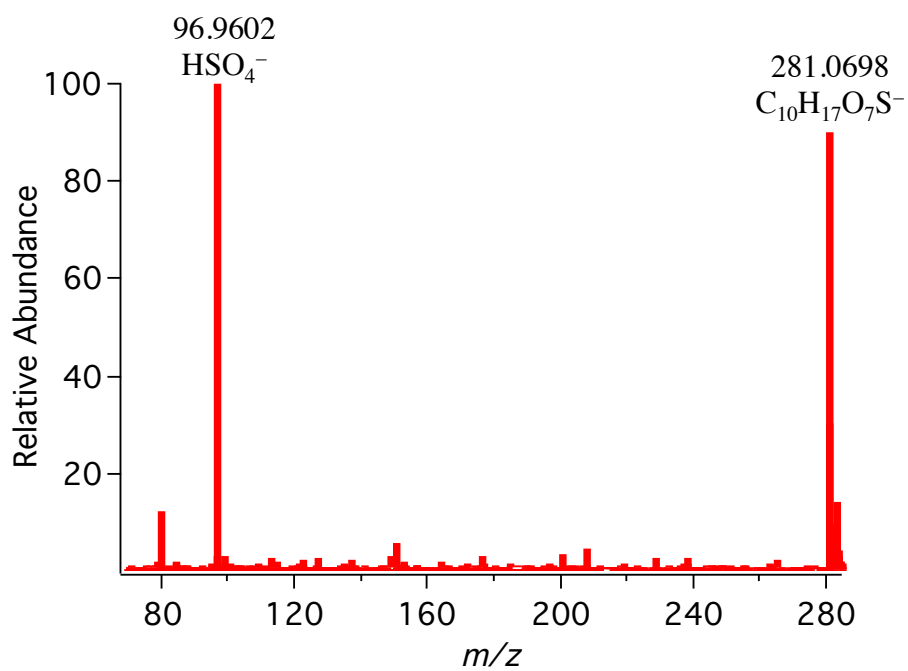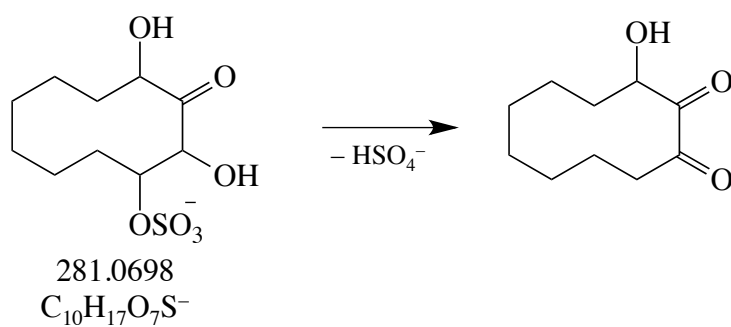

**Figure S13.** MS<sup>2</sup> spectrum and fragmentation scheme of the parent ion at  $m/z$  281.0698 identified in SOA formed from cyclodecane oxidation.



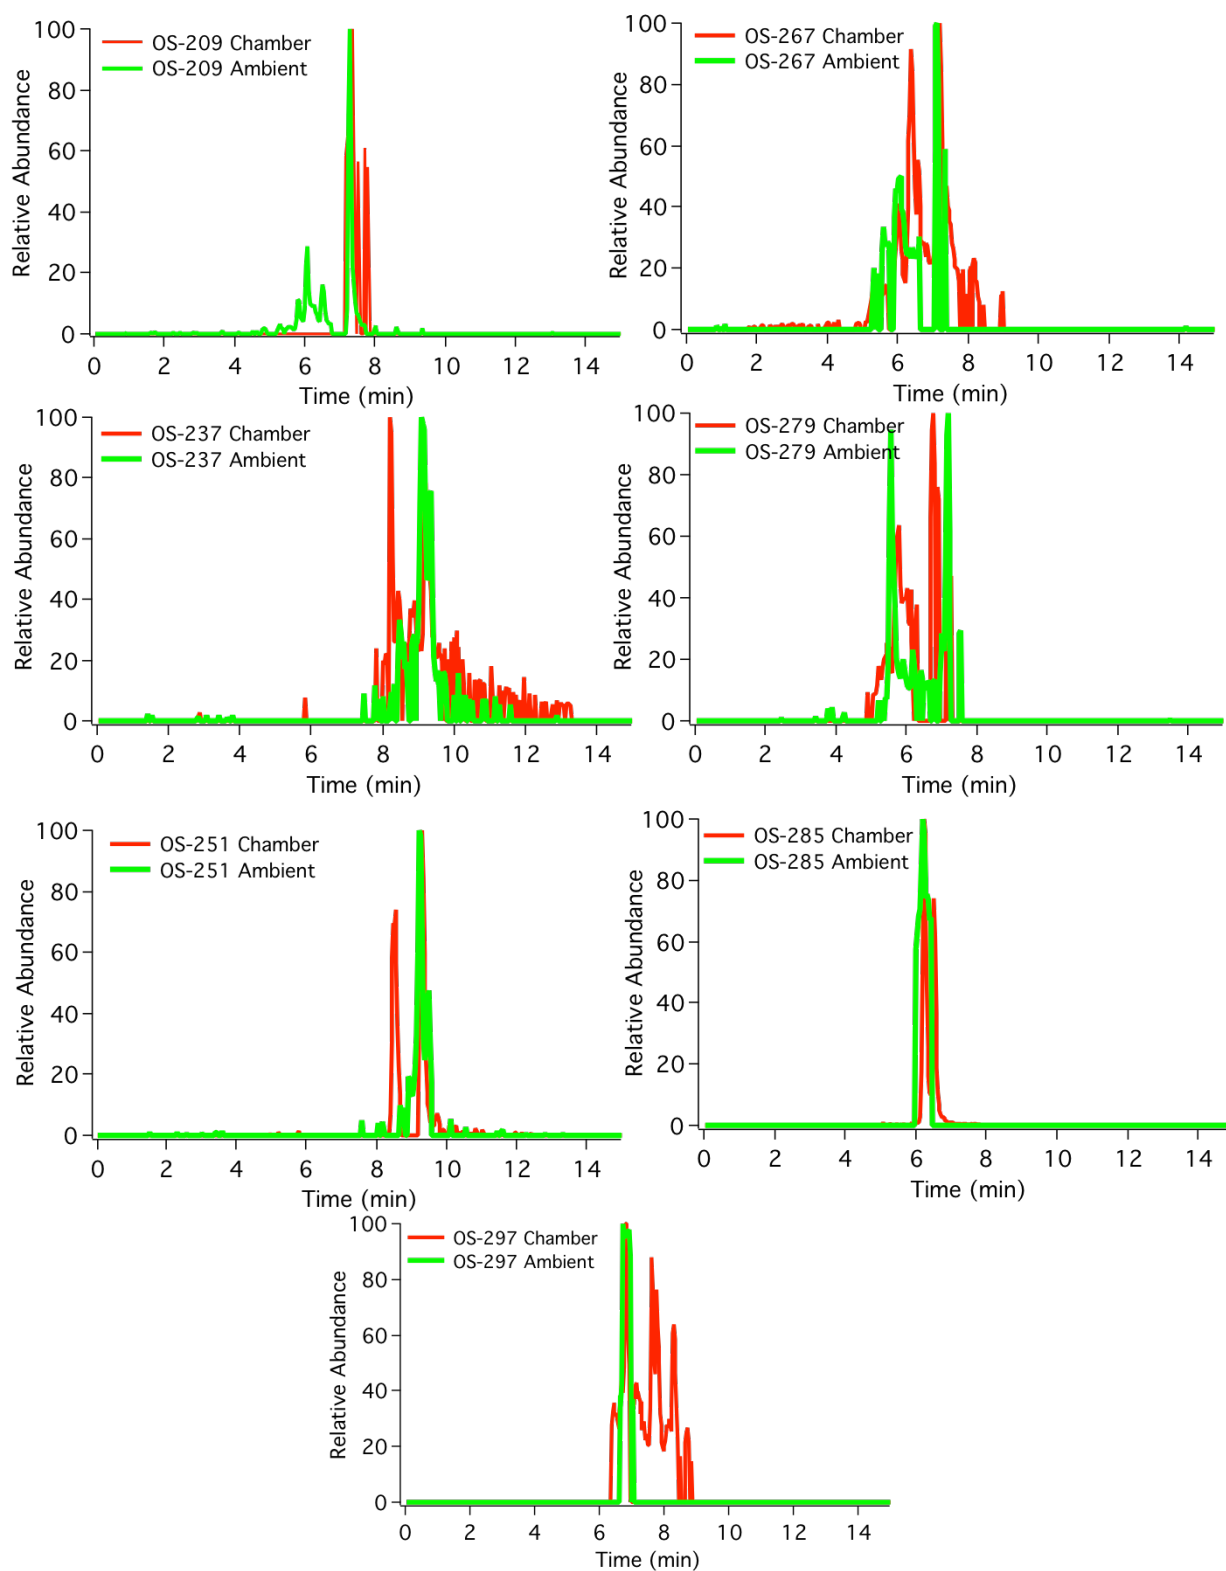

**Figure S15.** Extracted ion chromatograms (EICs) for alkane-derived OSs identified in aerosol collected from both smog chamber experiments (in red) and field studies (in green).
